# Supplementary material for: Tuning core–shell interactions in tungsten carbide–Pt nanoparticles for the hydrogen evolution reaction
Source: Royal Society of Chemistry journal article supplement (doi:10.1039/c8cp04113j), 2018-01-01
Supplement: c8cp04113j1.pdf [file c8cp04113j1.pdf]

**SUPPORTING INFORMATION**

**Tuning Core-Shell Interactions in Tungsten Carbide-Pt Nanoparticles for the  
Hydrogen Evolution Reaction**

**Akash Jain<sup>1</sup> and Ashwin Ramasubramaniam<sup>2,\*</sup>**

<sup>1</sup> Department of Chemical Engineering, University of Massachusetts, Amherst, MA 01003,  
U.S.A.

<sup>2</sup> Department of Mechanical and Industrial Engineering, University of Massachusetts, Amherst,  
MA 01003, U.S.A.

\*E-mail: [ashwin@engin.umass.edu](mailto:ashwin@engin.umass.edu)

## 1. Surface energy calculations

For stoichiometric surfaces of WC, the surface energy ( $\gamma$ ) is defined as,

$$\gamma_{surface} = \frac{E_{Slab} - N_{WC} \mu_{WC(Bulk)}}{A_0}, \quad (S1)$$

where  $E_{Slab}$  is the energy of periodic and symmetric surface slab,  $\mu_{WC(Bulk)}$  is the chemical potential of bulk  $\alpha$ -WC or  $\beta$ -WC per WC pair,  $N_{WC}$  is the total number of WC pairs in the slab, and  $A_0$  is total surface area of the slab.

For non-stoichiometric surfaces, the surface energy ( $\gamma$ ) is defined as,<sup>1,2</sup>

$$\gamma_{surface} = \frac{E_{Slab} - N_W \mu_W - N_C \mu_C}{A_0}, \quad (S2)$$

$$\mu_{WC(Bulk)} = \mu_W + \mu_C, \quad (S3)$$

$$\mu_{C,graphene} + \Delta H_{f,\alpha/\beta-WC} < \mu_C < \mu_{C,graphene} \quad (S4)$$

where  $\mu_W$  and  $\mu_C$  are the chemical potentials of bulk bcc W and C (graphene) respectively,  $N_W$  and  $N_C$  are the number of W and C atoms in the slab, and  $A_0$  is total surface area of the slab.

Figure S1 reports surface energies for various WC surfaces and is in good agreement with prior results of Li *et al.*<sup>3</sup> and Yates *et al.*<sup>4</sup>

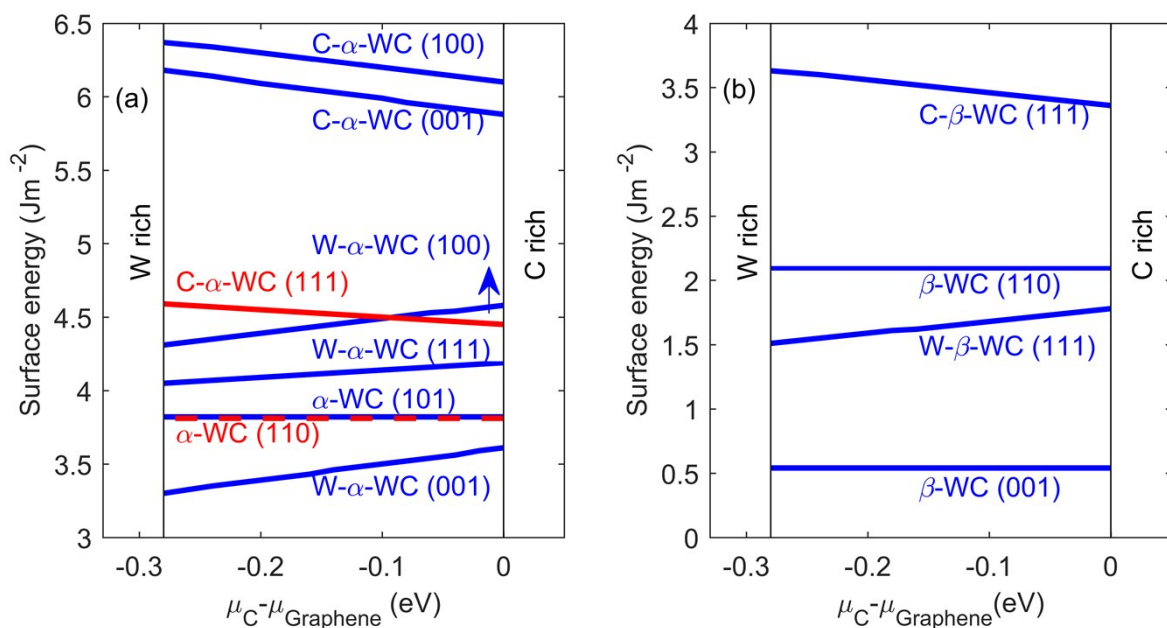

**Figure S1.** Surface energies of select low Miller-index surfaces of (a)  $\alpha$ -WC and (b)  $\beta$ -WC as a function of chemical potential of carbon (relative to graphene)

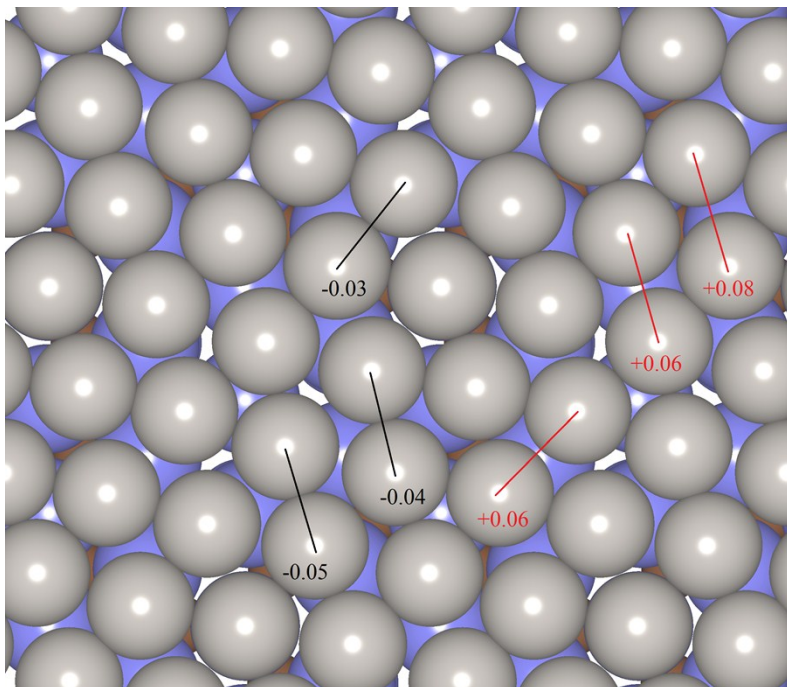

**Figure S2.** Relaxed structure of Pt ML over  $\alpha$ -WC (001) support in the p-(4x4) R15° supercell. W and Pt atoms are indicated by blue and grey spheres, respectively; C atoms are not visible in this view. The relaxed Pt ML has regions of both compressive and tensile strain; bond strains,  $\varepsilon_b = a/a_{\text{Pt}(111)} - 1$  ( $a_{\text{Pt}(111)} = 2.81 \text{ \AA}$ ), are indicated at a few sites.

## 2. DFT-based *ab initio* molecular dynamics (AIMD)

To test the stability of Pt monolayers over  $\beta$ -WC (111) and  $\beta$ -WC (001) surfaces,  $\text{Pt}_{\text{ML}}/\beta$ -WC (111) and  $\text{Pt}_{\text{ML}}/\beta$ -WC (001) slabs were subjected to DFT-based *ab initio* molecular dynamics (AIMD) at elevated temperatures. The system was heated from 0 to 1000 K at a rate of 2 K/fs over a duration of 0.5ps and then held at 1000K for another 0.5ps in a canonical ensemble. The monolayers retain their structural integrity over this entire process (Figures S3 & S4).

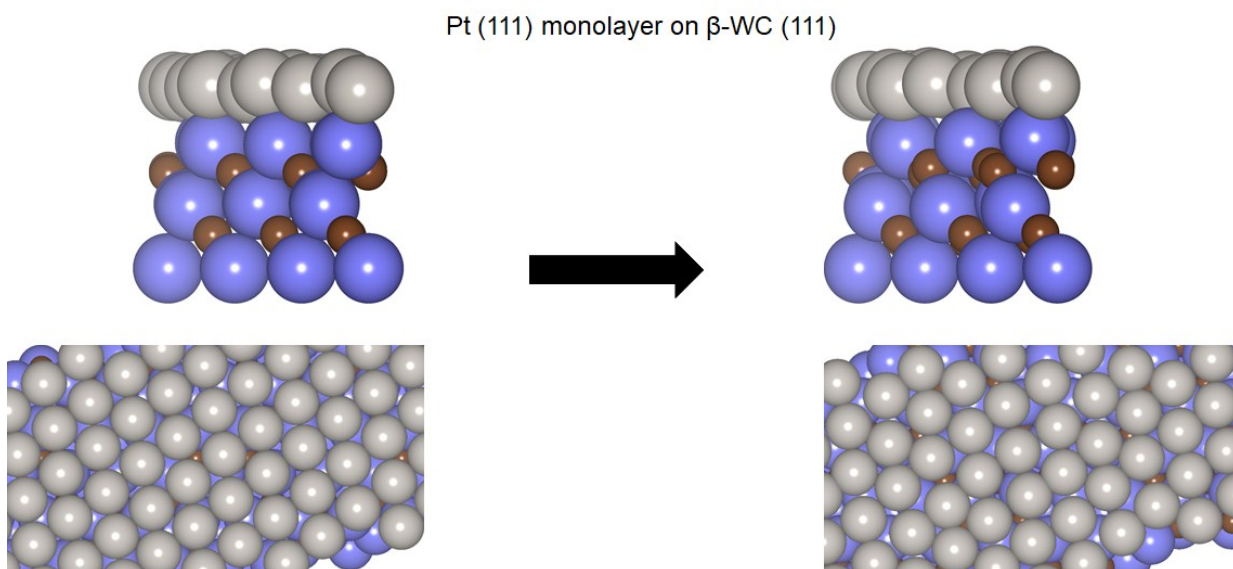

**Figure S3.**  $\text{Pt}_{\text{ML}}/\beta$ -WC (111) before (left) and after (right) AIMD trajectory

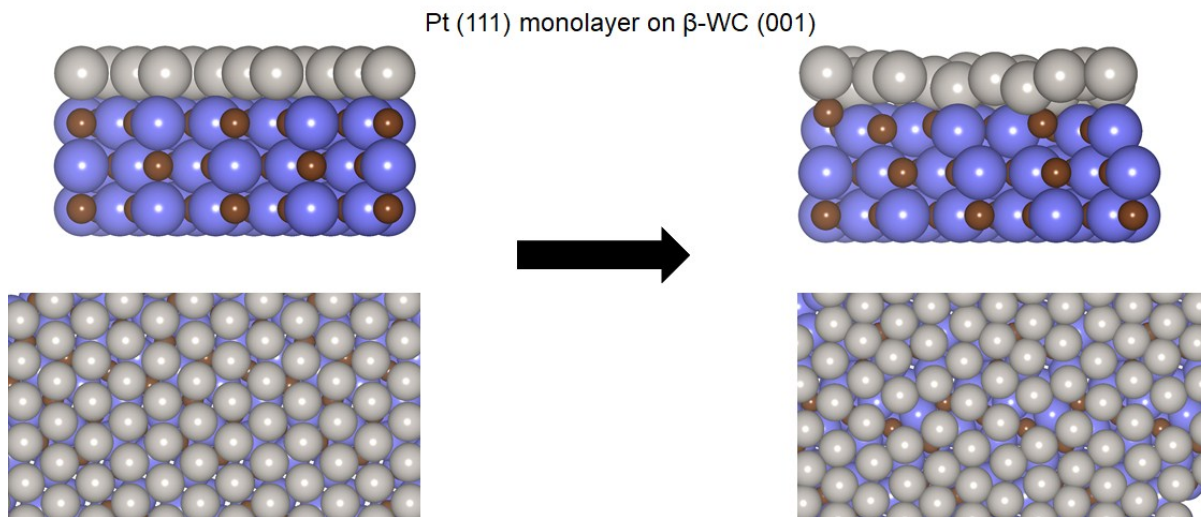

**Figure S4.**  $\text{Pt}_{\text{ML}}/\beta\text{-WC (001)}$  before (left) and after (right) AIMD trajectory

### 3. Preferred location of Ti atoms in $\beta\text{-WC (111)}$ and $\text{Pt}_{\text{ML}}/\beta\text{-WC (111)}$ slabs

To determine the preferred sites for Ti atoms in  $\beta\text{-WC (111)}$  and  $\text{Pt}_{\text{ML}}/\beta\text{-WC (111)}$  slabs (shown in Figures S6 & S7), we calculated the heat of formation,  $E_f$ , of the slabs with a single Ti dopant atom in different W layers of the slab; the three bottommost layers (2 C and 1 W) were frozen to simulate bulk-like conditions while the remaining layers were subjected to structural relaxation.

The heat of formation is defined as

$$E_f = \frac{E_{\text{Slab}} - n_W \mu_W - n_C \mu_C - n_{\text{Pt}} \mu_{\text{Pt}} - \mu_{\text{Ti}}}{V}, \quad (\text{S5})$$

where  $E_{\text{Slab}}$  is the total energy of slab;  $\mu_W$ ,  $\mu_C$ ,  $\mu_{\text{Pt}}$  and  $\mu_{\text{Ti}}$  are the chemical potentials of bulk W, C (graphene), Pt and Ti;  $n_W$ ,  $n_C$ ,  $n_{\text{Pt}}$  are the number of W, C and Pt atoms in the slab; and  $V$  is volume of the slab. As seen from Figures S6 & S7, there is a slight preference for the Ti

atom to occupy the second W subsurface layer; the energy differences are small enough though that the alloy such segregation effects may be neglected in the DFT model.

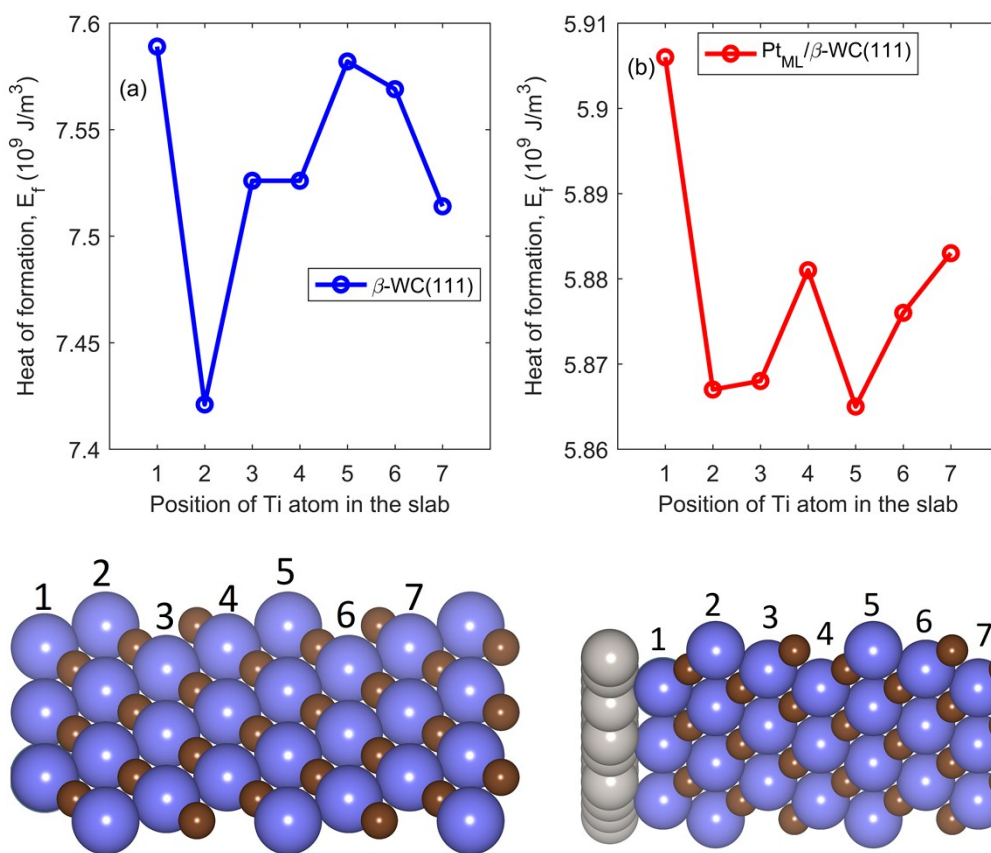

**Figure S5.** Heat of formation of (a)  $\beta$ -WC (111) and (b) Pt<sub>ML</sub>/ $\beta$ -WC (111) slabs as function of the position of a single Ti dopant atom (W – large blue spheres; C – small, brown spheres; Pt– large grey spheres)

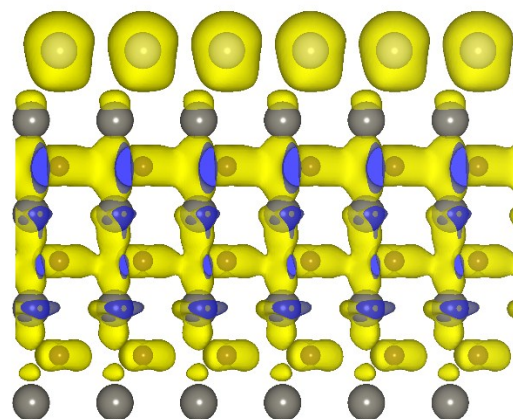

**Figure S6.** Partial charge density of  $\text{Pt}_{\text{ML}}/\alpha\text{-WC}$  (001) within an energy window of  $\pm 0.2$  eV of the Fermi level; isosurfaces are plotted at a value of  $0.007 \text{ e}/\text{\AA}^3$

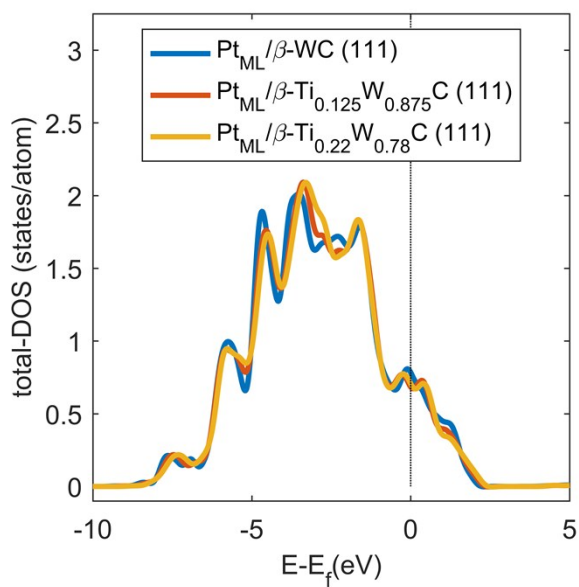

**Figure S7.** Total density of states for various  $\text{Pt}_{\text{ML}}/\beta\text{-Ti}_x\text{W}_{1-x}\text{C}$  (111) systems studied



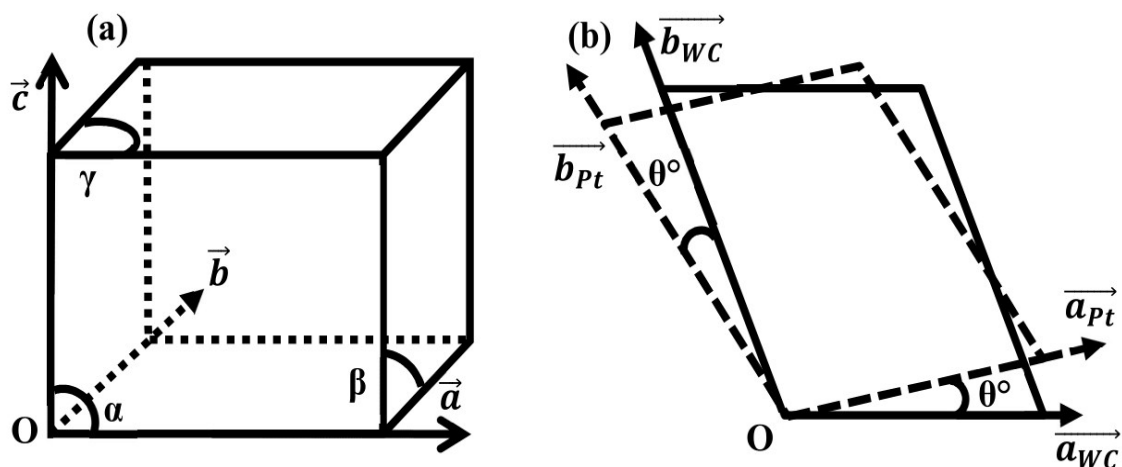

**Figure S8.** (a) Schematic of the supercell for the WC surface slabs and (b) illustration of the Pt (111) ML being rotated by an angle  $\theta^\circ$  with respect to WC surface supercell

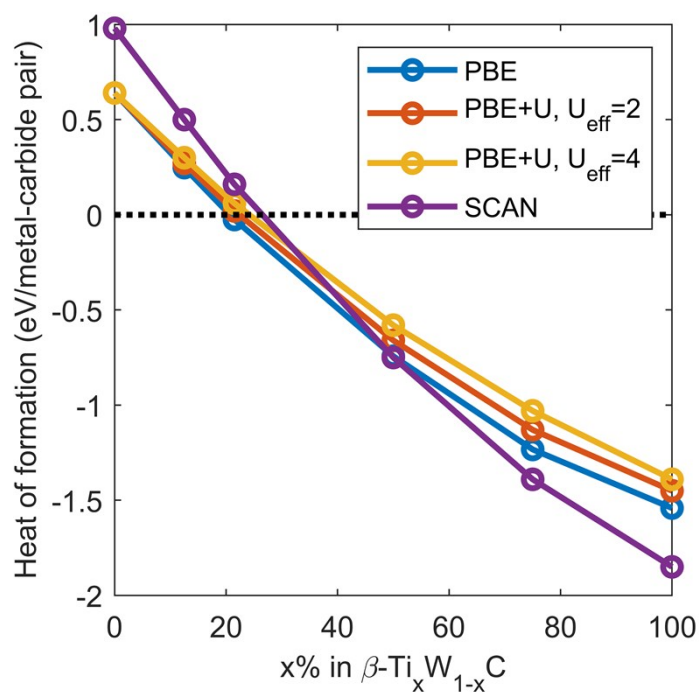

**Figure S9.** Heat of formation of  $\beta\text{-Ti}_x\text{W}_{1-x}\text{C}$  alloy (Eq. 7 in manuscript) as a function of Ti content ( $x\%$ ) with PBE, PBE+U, and SCAN functionals; two different values of  $U_{\text{eff}}=U-J$  are employed here for comparison. All calculations are performed at PBE-optimized lattice parameters and atomic positions.

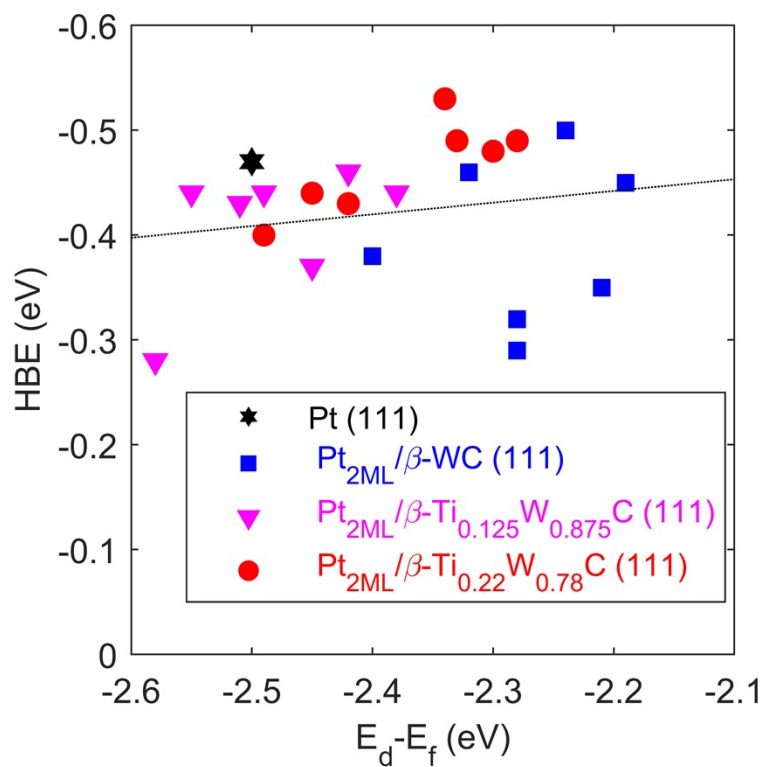

**Figure S10.** Hydrogen binding energy (HBE) versus  $d$ -band center relative to the Fermi-level ( $E_d - E_f$ ) of various adsorption sites on  $\text{Pt}_{2\text{ML}}/\beta\text{-Ti}_x\text{W}_{1-x}\text{C (111)}$  surfaces (Table S4); the solid line is a guide to the eye showing the approximate linear correlation

**Table S1.** Pt/WC slab models used in the calculation of formation energies;  $\alpha$  and  $\beta$  are fixed at  $90^\circ$  for all slabs and  $\theta$  is the relative rotation between the Pt (111) layer and the WC slab (see schematic in Figure S8)

|    | <b>Slab Model</b>                                                       | <b>Wood's<br/>Notation</b> | <b>Relative<br/>rotation (<math>\theta</math>)</b> | <b>Misfit<br/>factor (<math>\eta</math>)</b> | <b>Common unit cell</b>                        |
|----|-------------------------------------------------------------------------|----------------------------|----------------------------------------------------|----------------------------------------------|------------------------------------------------|
| 1. | Pt <sub>1-2ML</sub> / $\alpha$ -WC (001)                                | p-(1x1) R0°                | 0°                                                 | +3.90%                                       | a=2.92 Å, b=2.92 Å<br>$\gamma=120^\circ$       |
| 2. | Pt <sub>1-2ML</sub> / $\alpha$ -WC (001)                                | -                          | 0°                                                 | +3.00%                                       | a=2.92 Å, b=42.99 Å<br>$\gamma=109.84^\circ$   |
| 3. | Pt <sub>1-2ML</sub> / $\alpha$ -WC (001)                                | p-(4x4) R15°               | 15°                                                | -0.10%                                       | a=10.11 Å, b=10.11 Å<br>$\gamma=60^\circ$      |
| 4. | Pt <sub>1-2ML</sub> / $\beta$ -WC (001)                                 | -                          | 4°                                                 | +1.05%                                       | a=9.79 Å, b=19.58 Å<br>$\gamma=53.13^\circ$    |
| 5. | Pt <sub>1-2ML</sub> / $\beta$ -WC (111)                                 | p-(1x1) R0°                | 0°                                                 | +9.75%                                       | a=3.10 Å, b=3.10 Å<br>$\gamma=120^\circ$       |
| 6. | Pt <sub>1-2ML</sub> / $\beta$ -WC (111)                                 | p-(4x4) R23.3°             | 23.3°                                              | +1.19%                                       | a=12.38 Å, b=12.38 Å<br>$\gamma=60^\circ$      |
| 7. | Pt <sub>1-2ML</sub> / $\beta$ -WC (111)                                 | -                          | 23.3°                                              | -1.38%                                       | a=12.36 Å, b=24.52 Å<br>$\gamma = 19.11^\circ$ |
| 8. | Pt <sub>1-2ML</sub> / $\beta$ -Ti <sub>x</sub> W <sub>1-x</sub> C (111) | -                          | 23.3°                                              | -1.38%                                       | a=12.36 Å, b=24.52 Å<br>$\gamma = 19.11^\circ$ |

**Table S2.** HBEs of  $\beta\text{-Ti}_x\text{W}_{1-x}\text{C}$  (111) and  $\text{Pt}_{\text{ML}}/\beta\text{-Ti}_x\text{W}_{1-x}\text{C}$  (111) surfaces with random and segregated substitution of W atoms with Ti atoms

| Surface                                                                       | HBE (eV)      |                   |
|-------------------------------------------------------------------------------|---------------|-------------------|
|                                                                               | <i>Random</i> | <i>Segregated</i> |
| $\beta\text{-Ti}_{0.125}\text{W}_{0.875}\text{C}$ (111)                       | -0.70         | -0.65             |
| $\beta\text{-Ti}_{0.22}\text{W}_{0.78}\text{C}$ (111)                         | -0.68         | -0.65             |
| $\text{Pt}_{\text{ML}}/\beta\text{-Ti}_{0.125}\text{W}_{0.875}\text{C}$ (111) | +0.03         | -0.01             |
| $\text{Pt}_{\text{ML}}/\beta\text{-Ti}_{0.22}\text{W}_{0.78}\text{C}$ (111)   | +0.01         | +0.03             |

**Table S3.** HBEs of various surfaces studied in this paper; the Pt layers can show significant heterogeneity in local strains and only the most stable binding energies among several sites sampled are reported here

| Surface                                                                     | Site       | HBE (eV) |
|-----------------------------------------------------------------------------|------------|----------|
| Pt (111)                                                                    | Hcp hollow | -0.47    |
|                                                                             | Fcc hollow | -0.41    |
|                                                                             | Top        | -0.42    |
| $\alpha$ -WC (001)                                                          | Hcp hollow | -0.75    |
|                                                                             | Fcc hollow | -0.91    |
|                                                                             | Top        | +0.38    |
| Pt <sub>ML</sub> / $\alpha$ -WC (001)                                       | Hcp hollow | -0.41    |
|                                                                             | Fcc hollow | -0.38    |
|                                                                             | Top        | -0.49    |
| Pt <sub>2ML</sub> / $\alpha$ -WC (001)                                      | Hcp hollow | -0.52    |
|                                                                             | Fcc hollow | -0.52    |
|                                                                             | Top        | -0.09    |
| $\beta$ -WC (001)                                                           | Bridge     | -0.04    |
|                                                                             | Top W      | +0.10    |
|                                                                             | Top C      | -0.02    |
| $\beta$ -WC (111)                                                           | Hcp hollow | -0.94    |
|                                                                             | Fcc hollow | -0.94    |
|                                                                             | Top        | -0.81    |
| Pt <sub>ML</sub> / $\beta$ -WC (111)                                        | Hollow     | -0.03    |
|                                                                             | Bridge     | +0.01    |
|                                                                             | Top        | +0.15    |
| Pt <sub>2ML</sub> / $\beta$ -WC (111)                                       | Hollow     | -0.50    |
|                                                                             | Bridge     | -0.35    |
|                                                                             | Top        | -0.45    |
| $\beta$ -Ti <sub>0.125</sub> W <sub>0.875</sub> C (111)                     | Hcp hollow | -0.70    |
|                                                                             | Fcc hollow | -0.68    |
|                                                                             | Top        | -0.60    |
| Pt <sub>ML</sub> / $\beta$ -Ti <sub>0.125</sub> W <sub>0.875</sub> C (111)  | Hollow     | +0.06    |
|                                                                             | Bridge     | +0.03    |
|                                                                             | Top        | +0.16    |
| Pt <sub>2ML</sub> / $\beta$ -Ti <sub>0.125</sub> W <sub>0.875</sub> C (111) | Hollow     | -0.44    |
|                                                                             | Bridge     | -0.46    |
|                                                                             | Top        | -0.44    |
| $\beta$ -Ti <sub>0.22</sub> W <sub>0.78</sub> C (111)                       | Hcp hollow | -0.68    |
|                                                                             | Fcc hollow | -0.64    |
|                                                                             | Top        | -0.66    |
| Pt <sub>ML</sub> / $\beta$ -Ti <sub>0.22</sub> W <sub>0.78</sub> C (111)    | Hollow     | +0.05    |
|                                                                             | Bridge     | +0.01    |
|                                                                             | Top        | +0.15    |
| Pt <sub>2ML</sub> / $\beta$ -Ti <sub>0.22</sub> W <sub>0.78</sub> C (111)   | Hollow     | -0.53    |

|  |        |       |
|--|--------|-------|
|  | Bridge | -0.48 |
|  | Top    | -0.49 |

**Table S4.** HBEs of various adsorption sites on  $\text{Pt}_{2\text{ML}}/\beta\text{-Ti}_x\text{W}_{1-x}\text{C}$  (111) systems. Adsorption sites (top, bridge, and hollow) on  $\text{Pt}_{2\text{ML}}/\beta\text{-Ti}_x\text{W}_{1-x}\text{C}$  surfaces are chosen based on the site-projected  $d$ -band center energy,  $E_d$  (relative to the Fermi level,  $E_f$ ) to allow for systematic sampling of a range of HBEs. For bridge and hollow sites, the site-projected  $d$ -band energy is simply taken to be the average of the atom-projected  $d$ -band center energies of the nearest-neighbor Pt atoms.

| <i>Pt<sub>2ML</sub>/β-WC (111)</i>                                   |                  |          |
|----------------------------------------------------------------------|------------------|----------|
| Adsorption Site                                                      | $E_d - E_f$ (eV) | HBE (eV) |
| Top                                                                  | -2.19            | -0.45    |
| Top                                                                  | -2.40            | -0.38    |
| Bridge                                                               | -2.21            | -0.35    |
| Bridge                                                               | -2.28            | -0.32    |
| Hollow                                                               | -2.32            | -0.46    |
| Hollow                                                               | -2.24            | -0.50    |
| Hollow                                                               | -2.28            | -0.29    |
| <i>Pt<sub>2ML</sub>/β-Ti<sub>0.125</sub>W<sub>0.875</sub>C (111)</i> |                  |          |
| Adsorption Site                                                      | $E_d - E_f$ (eV) | HBE (eV) |
| Top                                                                  | -2.58            | -0.28    |
| Top                                                                  | -2.38            | -0.44    |
| Bridge                                                               | -2.55            | -0.44    |
| Bridge                                                               | -2.42            | -0.46    |
| Hollow                                                               | -2.51            | -0.43    |
| Hollow                                                               | -2.45            | -0.37    |
| Hollow                                                               | -2.49            | -0.44    |
| <i>Pt<sub>2ML</sub>/β-Ti<sub>0.22</sub>W<sub>0.78</sub>C (111)</i>   |                  |          |
| Adsorption Site                                                      | $E_d - E_f$ (eV) | HBE (eV) |
| Top                                                                  | -2.49            | -0.40    |
| Top                                                                  | -2.28            | -0.49    |
| Bridge                                                               | -2.45            | -0.44    |
| Bridge                                                               | -2.30            | -0.48    |
| Hollow                                                               | -2.42            | -0.43    |

|        |       |       |
|--------|-------|-------|
| Hollow | -2.33 | -0.49 |
| Hollow | -2.34 | -0.53 |

## References

1. J. E. Northrup and S. Froyen, *Phys. Rev. Lett.*, 1993, 71, 2276–2279.
2. J. E. Northrup and J. Neugebauer, *Phys. Rev. B*, 1995, 52, 17001–17004.
3. Y. Li, Y. Gao, B. Xiao, T. Min, Z. Fan, S. Ma and D. Yi, *Comput. Mater. Sci.*, 2011, **50**, 939–948.
4. J. L. R. Yates, G. H. Spikes and G. Jones, *Phys. Chem. Chem. Phys.*, 2015, **17**, 4250–4258.
